# Supplementary material
Source: PubMed Central journal article supplement (PMC4510952)
Supplement: NIHMS704546-supplement-supp.pdf [file NIHMS704546-supplement-supp.pdf]

eTable 1: Response rate of potential study participants and eligible pregnancies, according to occupational status

|                                                                                                    | Flight attendants      | Teachers             |
|----------------------------------------------------------------------------------------------------|------------------------|----------------------|
|                                                                                                    | No. (%) <sup>a</sup>   | No. (%) <sup>a</sup> |
| <b>Women</b>                                                                                       |                        |                      |
| Target population; no.                                                                             | 6376                   | 2012                 |
| Contacted                                                                                          | 5096 (80) <sup>b</sup> | 1582 (79)            |
| Eligible <sup>c</sup>                                                                              | 2595 (51)              | 466 (29)             |
| Participants                                                                                       | 2273 (88)              | 381 (82)             |
| <b>Pregnancies</b>                                                                                 |                        |                      |
| Among participants; no.                                                                            | 4785                   | 816                  |
| First trimester of pregnancy in study period <sup>d</sup>                                          | 1185 (25)              | 153 (19)             |
| Self-reported employment as a flight attendant or school teacher during the pregnancy <sup>e</sup> | 898 (76)               | 123 (80)             |
| Singleton pregnancies                                                                              | 881 (98)               | 119 (97)             |
| First-trimester exposures assessed <sup>f</sup>                                                    | 846 (96)               | 119 (100)            |
| <b>Miscarriage study</b>                                                                           |                        |                      |
| Study pregnancies analyzed <sup>g</sup>                                                            | 840                    | 118                  |
| Live births                                                                                        | 660 (79)               | 88 (75)              |
| Still births                                                                                       | 5 (1)                  | 0                    |
| Miscarriages                                                                                       | 175 (21)               | 30 (25)              |
| Early (weeks 1-13)                                                                                 | 162                    | 25                   |
| Late (weeks 14-20)                                                                                 | 13                     | 5                    |
| Participant women considered for analysis <sup>h</sup>                                             | 673                    | 91                   |

<sup>a</sup> Except where indicated.

<sup>b</sup> Of the 20% not contacted, 38% could not be located and 62% exceeded the maximum number of contact efforts.

- <sup>c</sup> Reasons for ineligibility for the main study included unmarried status during the study period (78%), not working as a flight attendant or teacher during study period (11%), surgical sterilization prior to study period (9%), and age out of eligible range (18-45 years, 2%).
- <sup>d</sup> Records-based occupational exposures for flight attendants were available only for 1 August 1992-31 July 1996.
- <sup>e</sup> Eligible study participants may not have worked as a flight attendant or teacher during a pregnancy occurring within the study period. Pregnancy-specific covariates (lifestyle, occupational, medical) were available only for women who self-reported employment as a flight attendant or school teacher during the pregnancy.
- <sup>f</sup> Exposures could not be accurately assessed for flight attendants who also worked as a hair stylist (n=1) or as a school teacher (n=10), who reported proximal melatonin use (n=2), or who had unavailable or irreconcilable flight records (n=22).
- <sup>g</sup> Study pregnancies analyzed further excluded women reporting systemic lupus erythematosus (n=2) or cancer with treatment or therapy prior to or during the pregnancy (n=5; Hodgkin's lymphoma and ovarian, endometrial, and cervical cancers).
- <sup>h</sup> Participant women were excluded from the miscarriage analysis for incomplete questionnaire (n=52), unknown gravidity (n=16), zero gravidity (n=435), or no eligible pregnancies (n=1387).

eTable 2: Association of physical demands at work among flight attendants with early miscarriage (gestational weeks 4-13) according to time period during pregnancy <sup>a</sup>

| Models <sup>b</sup>                                                             | Weeks 4-8 |            | Weeks 9-13 |            | Weeks 4-13 |            |
|---------------------------------------------------------------------------------|-----------|------------|------------|------------|------------|------------|
|                                                                                 | OR        | (95% CI)   | OR         | (95% CI)   | OR         | (95% CI)   |
| Composite variable model:                                                       |           |            |            |            |            |            |
| High physical job demands in pregnancy <sup>c</sup>                             | 2.1       | (1.0-4.4)  | 2.8        | (1.3-6.4)  | 2.4        | (1.5-4.1)  |
| Single-exposure models:                                                         |           |            |            |            |            |            |
| Lifting/carrying at least 15 pounds more than 10 times/day at work in pregnancy | 0.98      | (0.61-1.6) | 1.5        | (0.96-2.5) | 1.2        | (0.87-1.7) |
| Being on your feet more than 8 hours/day at work in pregnancy                   | 1.7       | (1.1-2.8)  | 2.1        | (1.2-3.8)  | 1.9        | (1.3-2.7)  |
| Bending at the waist more than 25 times/day at work in pregnancy                | 2.3       | (1.1-4.9)  | 1.9        | (0.92-3.9) | 2.1        | (1.2-3.6)  |
| Pushing/pulling at least 15 pounds 20 or more times/day at work in pregnancy    | 0.93      | (0.58-1.5) | 1.0        | (0.62-1.7) | 0.97       | (0.69-1.4) |
| Combined exposure model:                                                        |           |            |            |            |            |            |
| Lifting/carrying at least 15 pounds more than 10 times/day at work in pregnancy | 0.75      | (0.45-1.2) | 1.2        | (0.69-2.2) | 0.94       | (0.64-1.4) |
| Being on your feet more than 8 hours/day at work in pregnancy                   | 1.7       | (0.99-3.0) | 1.9        | (0.99-3.7) | 1.8        | (1.2-2.8)  |
| Bending at the waist more than 25 times/day at work in pregnancy                | 2.4       | (1.1-5.2)  | 1.6        | (0.72-3.4) | 2.0        | (1.1-3.5)  |
| Pushing/pulling at least 15 pounds 20 or more times/day at work in pregnancy    | 0.76      | (0.48-1.2) | 0.74       | (0.42-1.3) | 0.74       | (0.51-1.1) |

- <sup>a</sup> Models included 797 flight attendant study pregnancies (11 miscarriages in gestational weeks 1-3 and 32 pregnancies with one or more missing covariates were excluded).
- <sup>b</sup> All models additionally adjusted for age at the last menstrual period and parity.
- <sup>c</sup> High physical job demands defined as (1) being on your feet (including standing and walking) more than 8 hours/day or (2) two or more of the following: lifting or carrying objects that weigh at least 15 pounds more than 10 times a day, bending at the waist more than 25 times/day, and pushing or pulling heavy objects requiring at least 15 pounds of force or effort 20 or more times/day.
